# Supplementary material for: Clinical course and challenging management of early COVID-19 infection after heart transplantation: case report of two patients
Source: Springer Nature journal article supplement (doi:10.1186/s12879-021-05793-6), 2021-01-20
Supplement: MOESM1 [file 18783574]

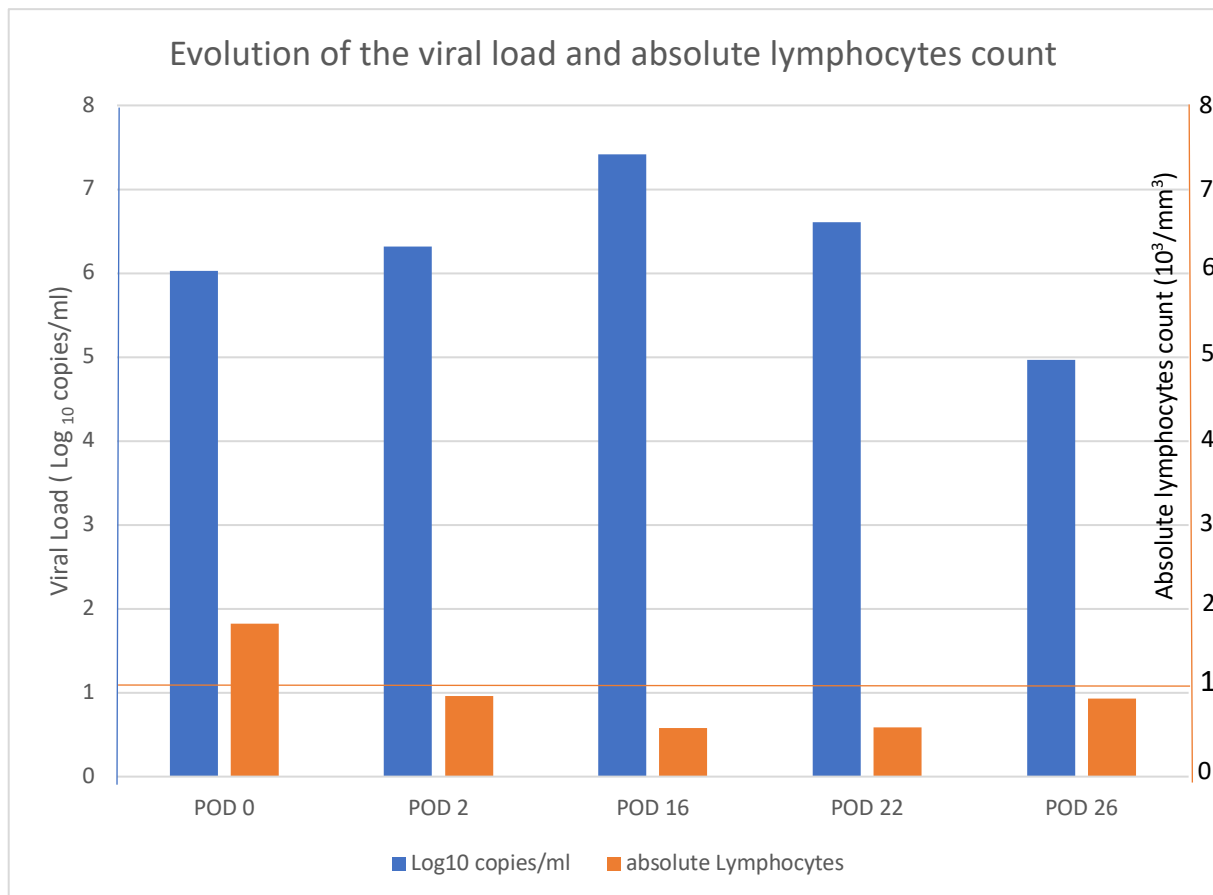

**Fig.5** Evolution of the viral load (expressed by Log<sub>10</sub> copies per milliliters) and the absolute lymphocytes count (expressed by 10<sup>3</sup>/mm<sup>3</sup>) in **Recipient 1**

The orange horizontal line represents the inferior limit of the normal range of the absolute lymphocyte count. We can see a progressive lymphopenia while the viral load increases gradually until its peak on POD16.

POD, postoperative day

\*The absolute lymphocyte count normal range (1,10-3,7x10<sup>3</sup>/mm<sup>3</sup>)
