# Supplementary material for: Clinical course and challenging management of early COVID-19 infection after heart transplantation: case report of two patients
Source: Springer Nature journal article supplement (doi:10.1186/s12879-021-05793-6), 2021-01-20
Supplement: MOESM2 [file 18783574]

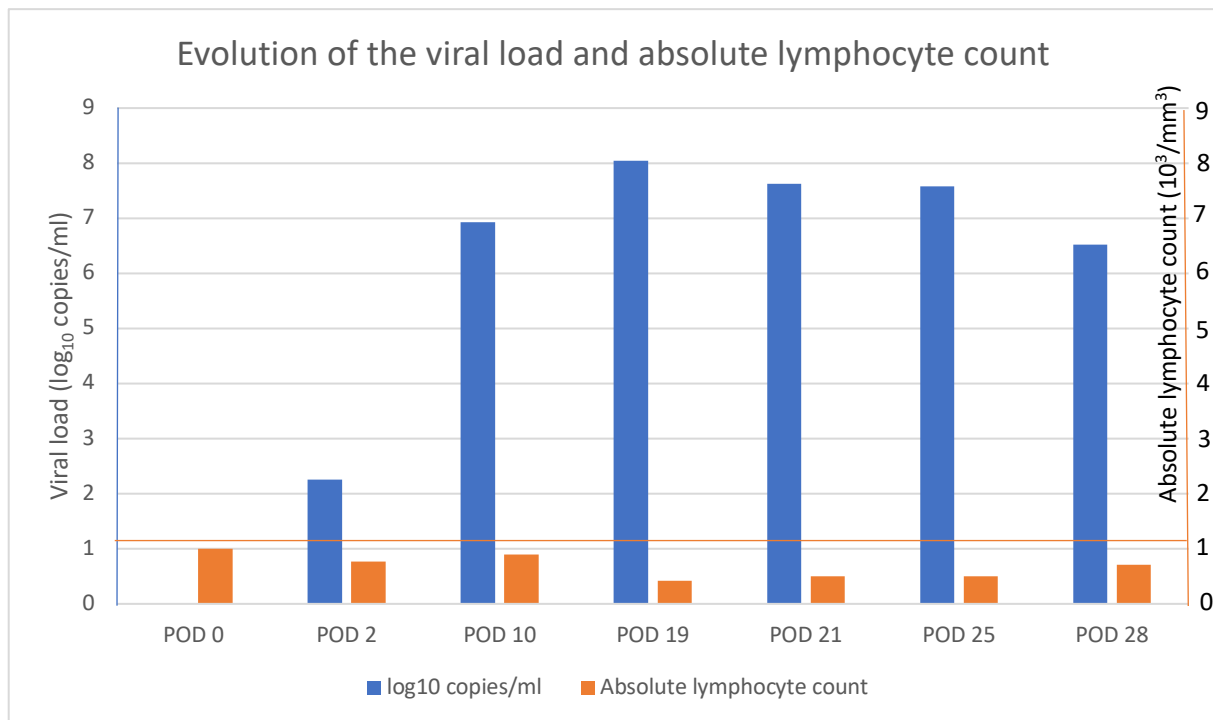

**Fig.6** Evolution of the viral load (expressed by log<sub>10</sub> copies per milliliters) and absolute lymphocytes count (10<sup>3</sup>/mm<sup>3</sup>) in **Recipient 2**

The Preoperative RT-PCR test was negative on POD 0. The horizontal orange line represents the inferior limit of the absolute lymphocyte count. We can observe a progressive lymphopenia while the viral load increases to reach a peak on POD 19.

POD, postoperative day; RT-PCR, reverse transcriptase polymerase chain reaction.

\*Absolute lymphocyte count normal range (1,10-3,7.10<sup>3</sup>/mm<sup>3</sup>)
